# Supplementary material for: Venular amyloid accumulation in transgenic Fischer 344 Alzheimer’s disease rats
Source: PubMed Central journal article supplement (PMC9464208; doi:10.1038/s41598-022-19549-y), 2022-09-10

Venular amyloid accumulation subsequent to cerebral  
amyloid angiopathy in transgenic Fischer 344 Alzheimer's  
disease rats

J. Bishay<sup>1</sup>, T.L. Beckett<sup>1</sup>, A.Y. Lai<sup>1</sup>, M.E. Hill<sup>1</sup>, D.  
McMahon<sup>2</sup>, J. McLaurin\*<sup>1,3</sup>.

<sup>1</sup>Biological Sciences; Sunnybrook Research Institute;  
Toronto, ON, M4N 3M5; Canada. <sup>2</sup>Physical Sciences;  
Sunnybrook Research Institute; Toronto, ON, M4N  
3M5; Canada. <sup>3</sup>Laboratory Medicine and  
Pathobiology, Temerty Faculty of Medicine;  
University of Toronto; Toronto, ON, M5S 1A8;  
Canada.

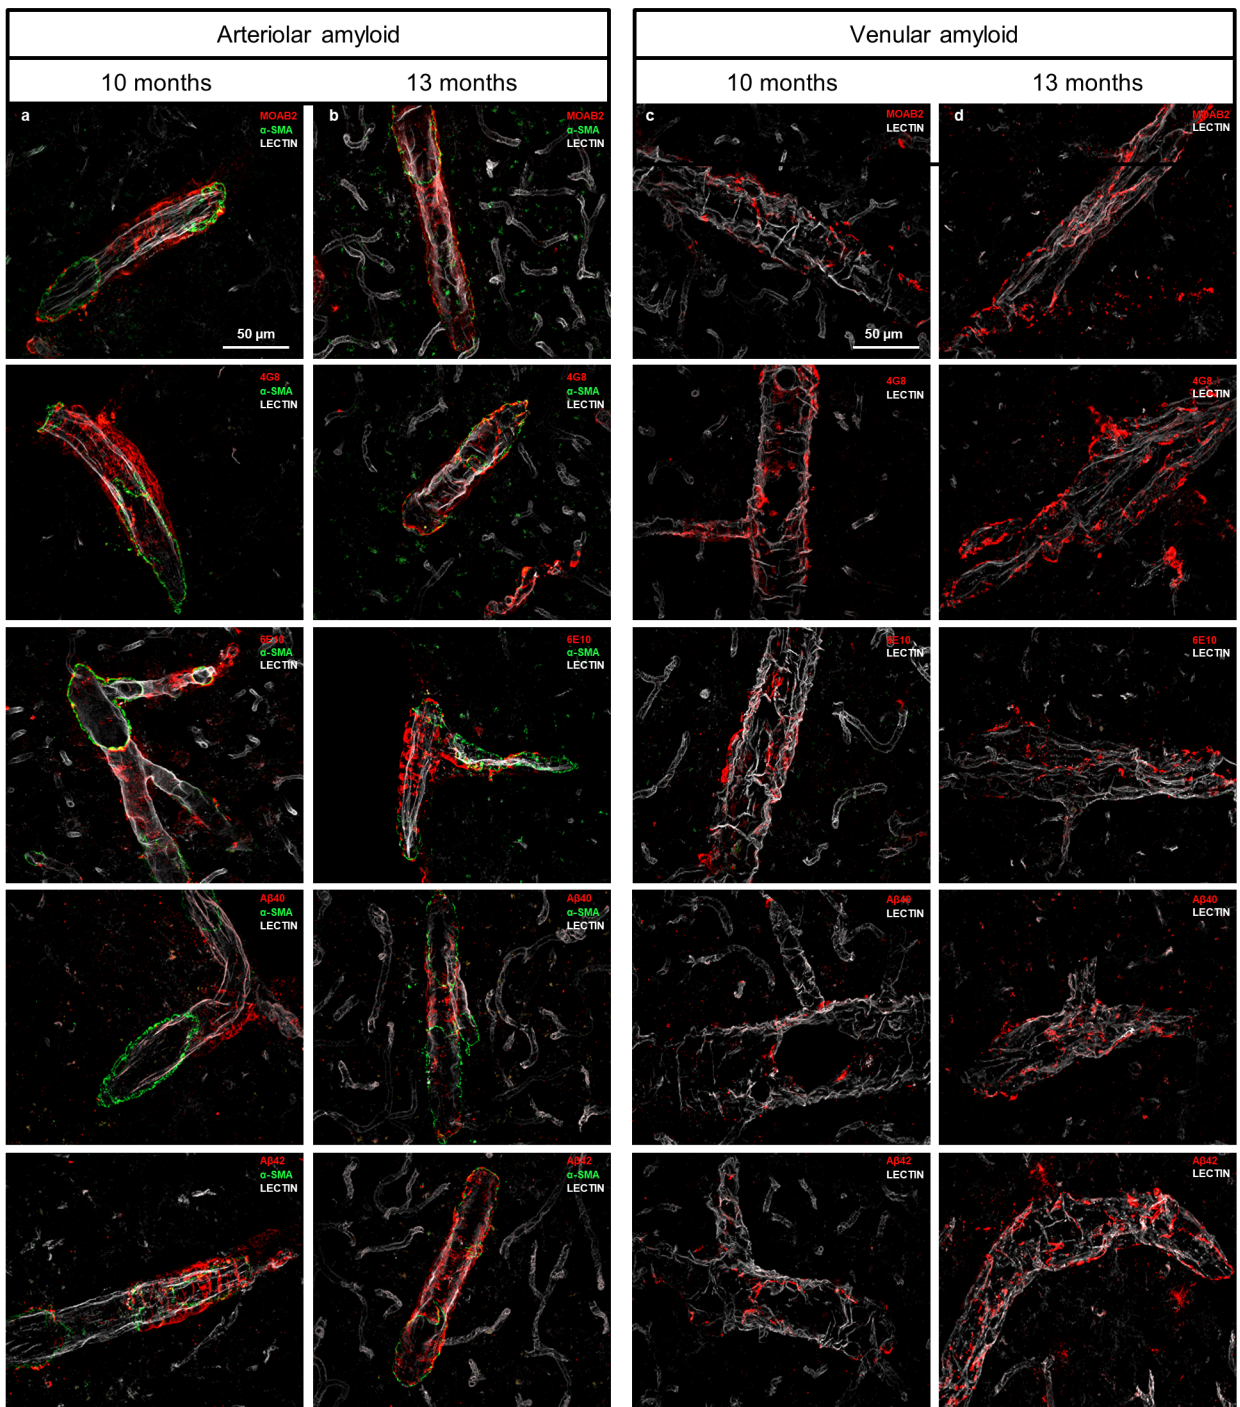

**Supplementary Figure S1. Arteriolar and venular amyloid deposition at 10 and 13 months of age.**

An array of A $\beta$  antibodies, including MOAB2, 4G8, 6E10, A $\beta$ <sub>40</sub>, and A $\beta$ <sub>42</sub> (red) were used to visualize arteriolar (a, b) and venular (c, d) A $\beta$ . Vascular A $\beta$  at 10 months (a, c) and 13 months (b, d) demonstrated progression of arteriolar and venular A $\beta$ . High resolution images were obtained at a 40x objective.

## Arteriolar amyloid

## Venular amyloid

## Supplementary Figure S2.

## Vascular Amyloid Severity Score

**Classification.** Vascular amyloid was evaluated semi-quantitatively by categorizing penetrating arterioles and ascending venules through five different grades – no coverage (grade 0), trace/scattered coverage (grade 1), mild (grade 2), moderate (grade 3), and severe coverage (grade 4) – as established by previous literature [36, 37]. For arteriolar amyloid (**a**), a score of 2 represented partial circumferential staining, a score of 3 indicated an almost complete circumferential staining, and a score of 4 displayed complete circumferential staining with amyloid spreading into the surrounding neuropil. A score of 2 for venular amyloid (**b**) indicated by an increase in the number of small globular deposits compared to a score of 1. A score of 3 indicated further accumulation of the globular deposits which are less scattered, with a presence of slightly larger deposits. Severe coverage (score = 4) is represented by substantial aggregation of larger sized globular deposits around the venule. Images were acquired with a 20x objective.

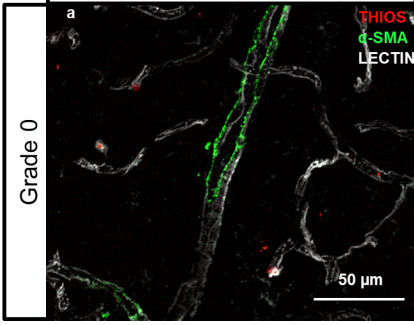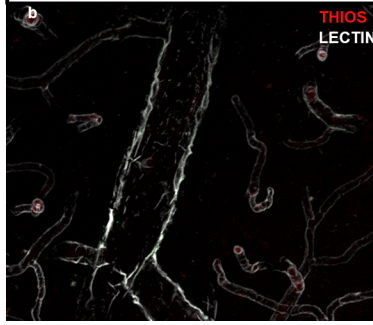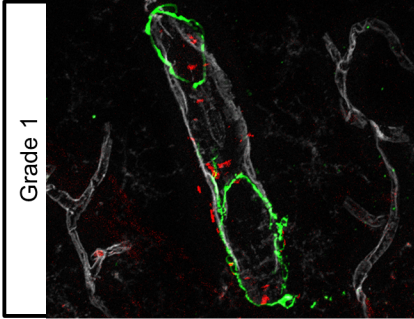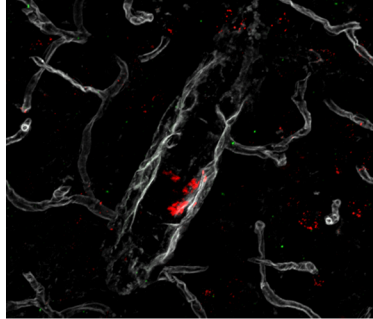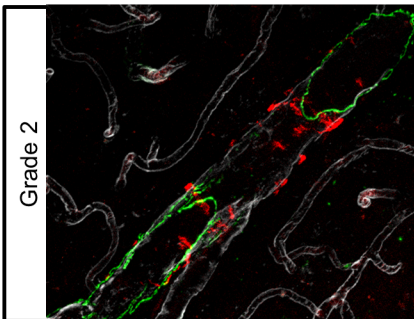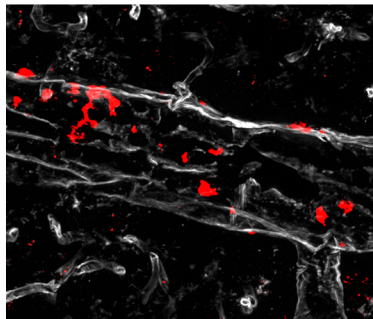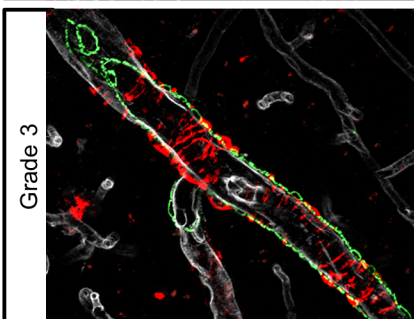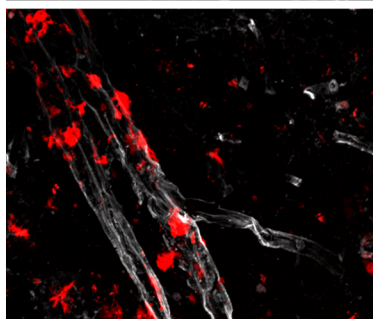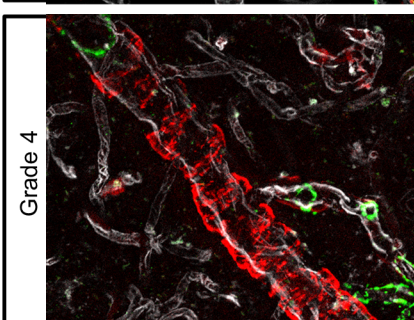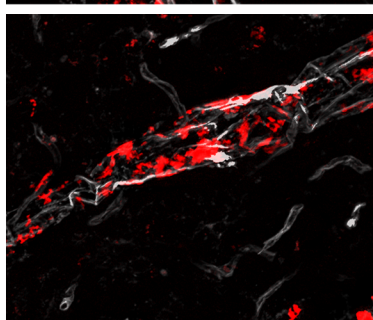

Supplement: 41598_2022_19549_MOESM1_ESM.pdf [file 41598_2022_19549_MOESM1_ESM.pdf]
